# Supplementary material
Source: Elsevier journal article supplement (https://comptes-rendus.academie-sciences.fr/chimie/article/10.1016/j.crci.2012.05.008/file/attach/mmc1.pdf)
Supplement: mmc1 [file mmc1.pdf]

**4a**

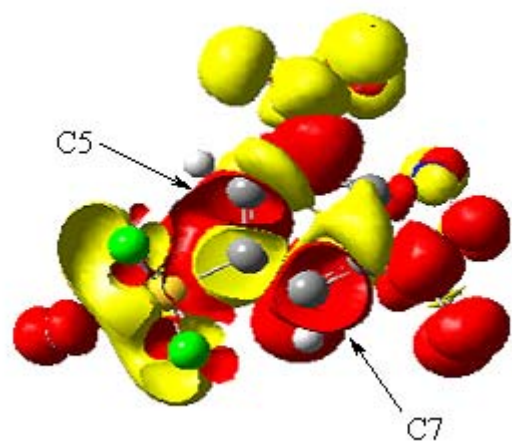

**4b**

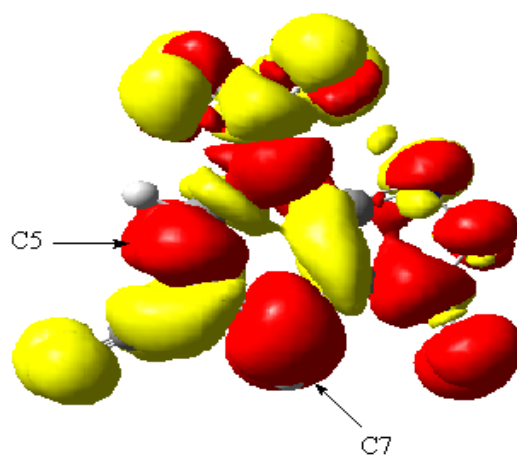

**4c**

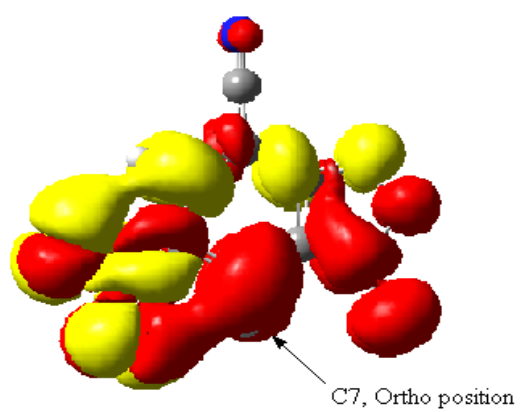

**4d**

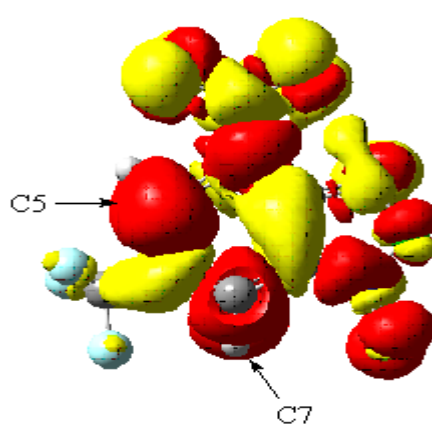

**1e**

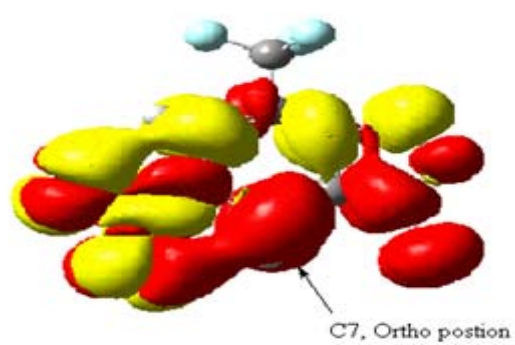

**Figure S1**  $\Delta f(r)$  calculated at the B3LYP/6-31G(d) level.
